# Supplementary material for: A one-step ionic liquid-assisted ultrasonic method for the preparation of BiOCl/m-BiVO4 heterojunctions with enhanced visible light photocatalytic activity
Source: Royal Society of Chemistry journal article supplement (doi:10.1039/c5ce01312g), 2015-01-01
Supplement: c5ce01312g1.pdf [file c5ce01312g1.pdf]

# A one step ionic liquid assisted ultrasonic method for preparation of BiOCl/m-BiVO<sub>4</sub> heterojunctions with enhanced visible light photocatalytic activity

Chengyu Yang,<sup>a</sup> Feng Li<sup>a</sup> and Taohai Li<sup>a\*</sup>

<sup>a</sup> College of Chemistry, Key Lab of Environment Friendly Chemistry and Application in Ministry of Education, Xiangtan University, Xiangtan, 411105, China. Fax: 86-731-58292251; Tel: 86-731-58292206; E-mail: [hnlth@xtu.edu.cn](mailto:hnlth@xtu.edu.cn)

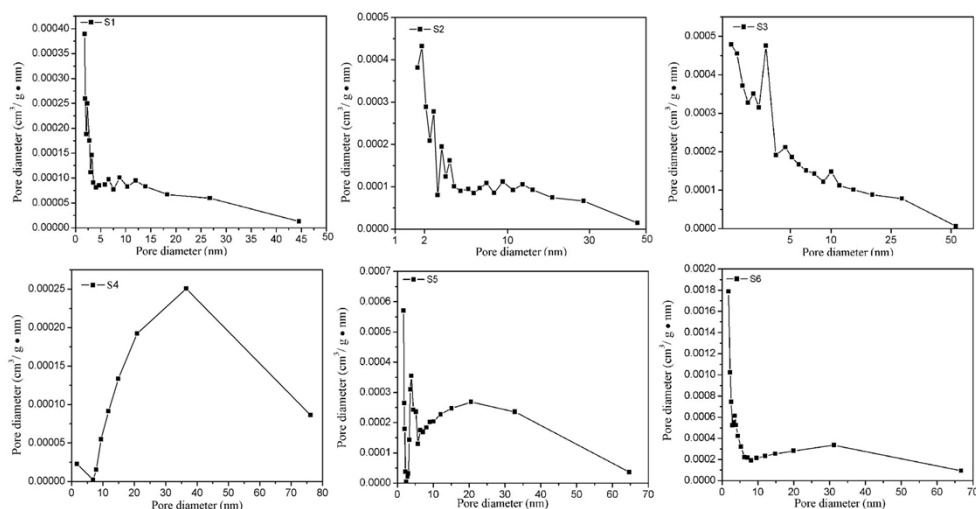

**Figure S1.** The pore-size distribution of of BiOCl/m-BiOCl heterojunctions prepared via ionic liquid assisted ultrasonic method.
